# Supplementary material for: Development of bacterial communities in biological soil crusts along a revegetation chronosequence in the Tengger Desert, northwest China
Source: Copernicus journal article supplement (doi:10.5194/bg-14-3801-2017), 2017-08-23
Supplement: Supplementary file 1 [file bg-14-3801-2017-supplement.zip]

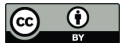

## *Supplement of*

# **Development of bacterial communities in biological soil crusts along a revegetation chronosequence in the Tengger Desert, northwest China**

**Lichao Liu et al.**

*Correspondence to:* Yubing Liu (liuyb@lzb.ac.cn)

- [bg-14-3801-2017-supplement-title-page.pdf](#)
- Supplement materials
  - [Table S1.docx](#)
  - [Table S2.xlsx](#)
  - [Table S3.xlsx](#)
  - [Table S4.xlsx](#)
  - [Table S5.docx](#)

The copyright of individual parts of the supplement might differ from the CC BY 3.0 License.
