# Supplementary material for: Development of bacterial communities in biological soil crusts along a revegetation chronosequence in the Tengger Desert, northwest China
Source: Copernicus journal article supplement (doi:10.5194/bg-14-3801-2017), 2017-08-23
Supplement: Supplementary file 2 [file bg-14-3801-2017-supplement.zip]

Archive with 7 entries (6 files):
- bg-14-3801-2017-supplement-title-page.pdf
- Supplement materials/
- Supplement materials/Table S3.xlsx
- Supplement materials/Table S4.xlsx
- Supplement materials/Table S1.docx
- Supplement materials/Table S2.xlsx
- Supplement materials/Table S5.docx
