# Supplementary material for: Development of bacterial communities in biological soil crusts along a revegetation chronosequence in the Tengger Desert, northwest China
Source: Copernicus journal article supplement (doi:10.5194/bg-14-3801-2017), 2017-08-23
Supplement: Supplementary file 2 [file bg-14-3801-2017-supplement.zip › Supplement materials/Table S3.xlsx]

## Sheet: 100.family
Table S3. Family with the relative abundance > 1 % in any sample of BSC (%). MS, 5YR, 15YR, 28YR, 34YR and 51YR represent mobile sand, 5-, 15-, 28-, 34- and 51-year-old BSC, respectively. Triplicate samples were analyzed in each age of BSC.
XXX	MS	5YR	15YR	28YR	34YR	51YR
Bacillaceae	36118	16992	6010	10607	7843	1616
Enterococcaceae	19549	9327	2848	5101	4151	656
Streptococcaceae	18530	8641	2887	4645	3875	758
SubsectionIII_familyi	69	17316	2152	787	1406	4120
Geodermatophilaceae	1448	3881	4556	3806	5131	4364
RB41	614	1014	7216	3967	3705	5406
Methylobacteriaceae	1038	2552	4002	2269	3672	3320
JG34-KF-361	249	678	4102	4065	3484	3626
Acidimicrobiales_uncultured	1717	1392	2833	3080	3146	2763
JG34-KF-161	362	1380	2706	2782	3078	4020
JG30-KF-CM45_norank	439	1352	3148	3324	2924	2730
Actinobacteria_norank	875	601	1615	3742	2456	2788
Micromonosporaceae	328	599	2228	2097	2383	4249
Enterobacteriaceae	5718	2395	725	1522	1048	178
Rubrobacteriaceae	266	953	2513	2937	2510	2314
Nocardioidaceae	482	837	2028	1669	1777	3062
Bradyrhizobiaceae	549	1813	2158	1297	1893	2061
AT425-EubC11_terrestrial_group_norank	355	2047	1646	1605	1786	1642
Micrococcaceae	1502	3168	891	1149	1786	370
Unknown_Family	292	737	2468	1655	1577	2085
Clostridiaceae_2	4293	1711	545	1055	734	140
AKIW781	330	1036	1748	1213	1385	1970
C0119_norank	60	126	1958	1253	2313	1855
Roseiflexaceae	446	717	2006	1456	1669	1027
Rhodobacteraceae	529	2631	1137	849	913	1086
Solirubrobacterales_unclassified	209	232	1207	1385	1898	1887
Pseudonocardiaceae	255	1120	937	1194	1203	1787
Subgroup_6_norank	360	465	1210	1673	1377	1371
0319-6M6	393	392	1491	1456	1234	1200
TK10_norank	235	406	1354	1202	1147	1188
Cytophagaceae	281	1259	897	671	936	1486
Acetobacteraceae	244	794	1238	782	1013	1257
SubsectionI_familyi	1	51	1195	708	376	2962
Chitinophagaceae	271	717	1230	950	1014	951
Solirubrobacteraceae	422	509	1029	989	899	1102
Gemmatimonadaceae	312	499	885	1123	1104	898
Sphingomonadaceae	265	670	936	747	904	1095
Rhodospirillaceae	171	426	972	865	1047	1066
Rhizobiales_unclassified	136	345	1153	794	927	1174
KD4-96_norank	350	555	770	1111	868	796
Acidimicrobiales_unclassified	136	225	1049	689	1238	1097
Caulobacteraceae	75	471	913	709	886	1279
Patulibacteraceae	494	439	1286	823	661	601
Propionibacteriaceae	236	729	732	601	877	1042
Saccharibacteria_norank	340	873	918	686	786	605
Armatimonadetes_norank	107	404	963	694	827	881
ABS-19	150	149	1216	1134	637	472
Planctomycetaceae	67	419	767	586	863	921
Gitt-GS-136_norank	179	327	594	1188	655	492
Frankiales_uncultured	540	1015	565	321	457	498
Cyanobacteria_norank	50	99	617	217	423	1905
Hyphomicrobiaceae	163	371	573	629	640	928
Subgroup_7_norank	114	227	909	689	668	522
Chloroflexi_unclassified	37	53	144	162	683	2005
480-2	191	366	1005	624	466	419
Gaiellales_uncultured	162	246	543	703	543	593
Carnobacteriaceae	1279	574	185	332	224	28
JG30-KF-CM66_norank	108	146	559	738	550	487
Acidimicrobiaceae	309	330	460	469	468	417
FFCH7168	24	253	408	312	456	996
Paenibacillaceae	1119	533	151	304	234	39
Anaerolineaceae	125	158	466	534	479	437
TRA3-20_norank	99	142	454	445	538	518
DA101_soil_group	23	70	343	165	241	1293
Trueperaceae	42	963	310	375	242	195
Actinobacteria_unclassified	105	187	353	584	344	551
Rhodospirillales_Incertae_Sedis	120	414	403	300	374	269
AKYG1722_norank	58	152	415	443	392	377
Microbacteriaceae	202	424	288	336	361	186
SubsectionIV_familyi	2	5	156	209	253	1128
Bacteria_unclassified	63	97	381	450	384	296
Xanthobacteraceae	117	105	310	377	397	307
Caldilineaceae	66	148	353	350	339	265
Chthoniobacteraceae	37	170	323	173	226	444
FFCH13075	16	26	383	302	317	288
Cystobacteraceae	132	217	229	231	263	235
Ardenticatenales_norank	54	98	317	336	285	140
Cyanobacteria_uncultured	1	215	175	460	116	263
Iamiaceae	47	166	280	221	269	208
Xanthomonadales_Incertae_Sedis	148	256	173	277	210	108
Comamonadaceae	175	210	175	204	215	186
Euzebyaceae	43	118	168	190	223	409
Streptomycetaceae	299	127	169	271	205	79
Haliangiaceae	46	61	344	160	130	408
S085_norank	43	56	241	332	229	206
288-2	28	39	233	295	212	291
Rickettsiales_Incertae_Sedis	60	66	232	239	222	182
Kineosporiaceae	39	171	162	138	166	303
Nitrospira_norank	87	106	203	232	204	130
DA111	61	44	205	234	229	181
Armatimonadales_norank	30	123	247	192	188	145
Burkholderiaceae	64	173	103	113	137	319
Sphingomonadales_unclassified	47	238	152	130	136	187
43063	29	21	83	95	605	56
Mycobacteriaceae	64	98	150	158	177	232
Oxalobacteraceae	184	183	148	177	121	62
Sporichthyaceae	90	90	219	143	154	163
AKYG937	46	71	125	218	200	194
Nitrosomonadaceae	87	150	145	168	156	141
Pseudomonadaceae	375	151	45	85	124	61
